# Supplementary material for: Microglial TREM-1 receptor mediates neuroinflammatory injury via interaction with SYK in experimental ischemic stroke
Source: Cell Death Dis. 2019 Jul 19;10(8):555. doi: 10.1038/s41419-019-1777-9 (PMC6642102; doi:10.1038/s41419-019-1777-9)
Supplement: Supplementary file 3 — Supplementary Table S2 [file 41419_2019_1777_MOESM3_ESM.pdf]

Supplementary Table S2 The differential expressed immune genes in the peri-infarct region at 24 h post-modeling

[illegible]
